# Supplementary material
Source: publisher site journal article supplement (http://www.spandidos-publications.com/5787/downloadSupplementary)

Video S1. Repeated collisions of the hyoid bone with the internal carotid artery were seen during the patient's swallowing maneuvers.

Figure S1. Time-of-flight magnetic resonance angiography image shows that a right-sided internal carotid artery lesion does have the potential to cause a left-sided cerebral infarct lesion.

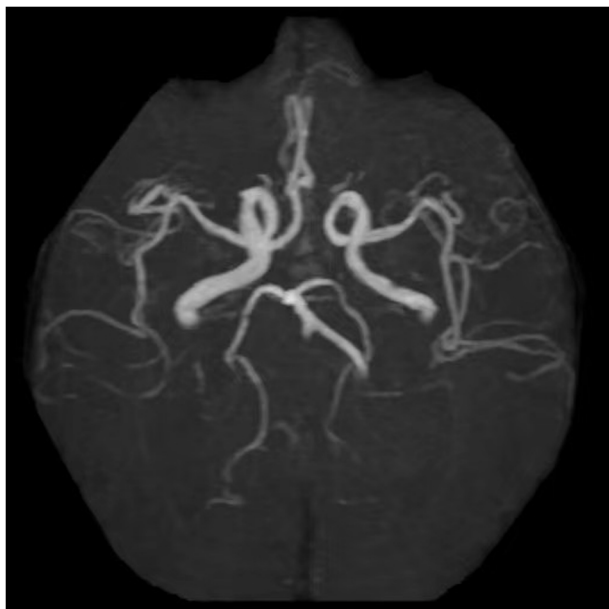

Supplement: Supplementary file 1 [file downloadSupplementary]
